# Supplementary material for: One-step facile synthesis of SnO2@Nd2O3 nanocomposites for selective amidol detection in aqueous phase
Source: Royal Society of Chemistry journal article supplement (doi:10.1039/d0nj00421a), 2020-01-01
Supplement: d0nj00421a1.pdf [file d0nj00421a1.pdf]

## Electronic Supplemental Materials (ESM)

(Φ) UV/visible spectroscopy analyses:

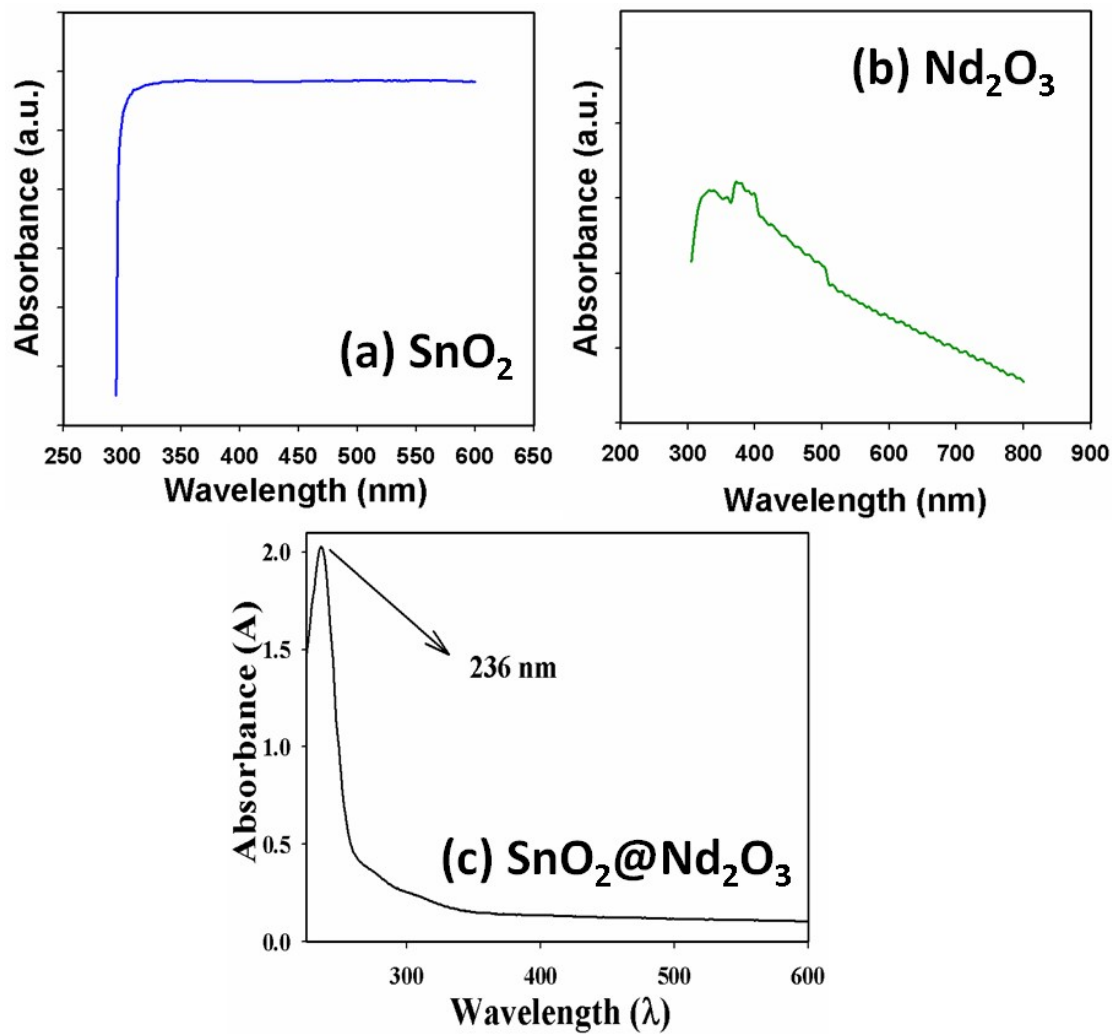

Fig. S1. Comparative UV/vis. Spectroscopic analysis of (a)  $\text{SnO}_2$ , (b)  $\text{Nd}_2\text{O}_3$ , and (c)  $\text{SnO}_2@\text{Nd}_2\text{O}_3$  nanocomposites

**(β) FTIR analyses:**

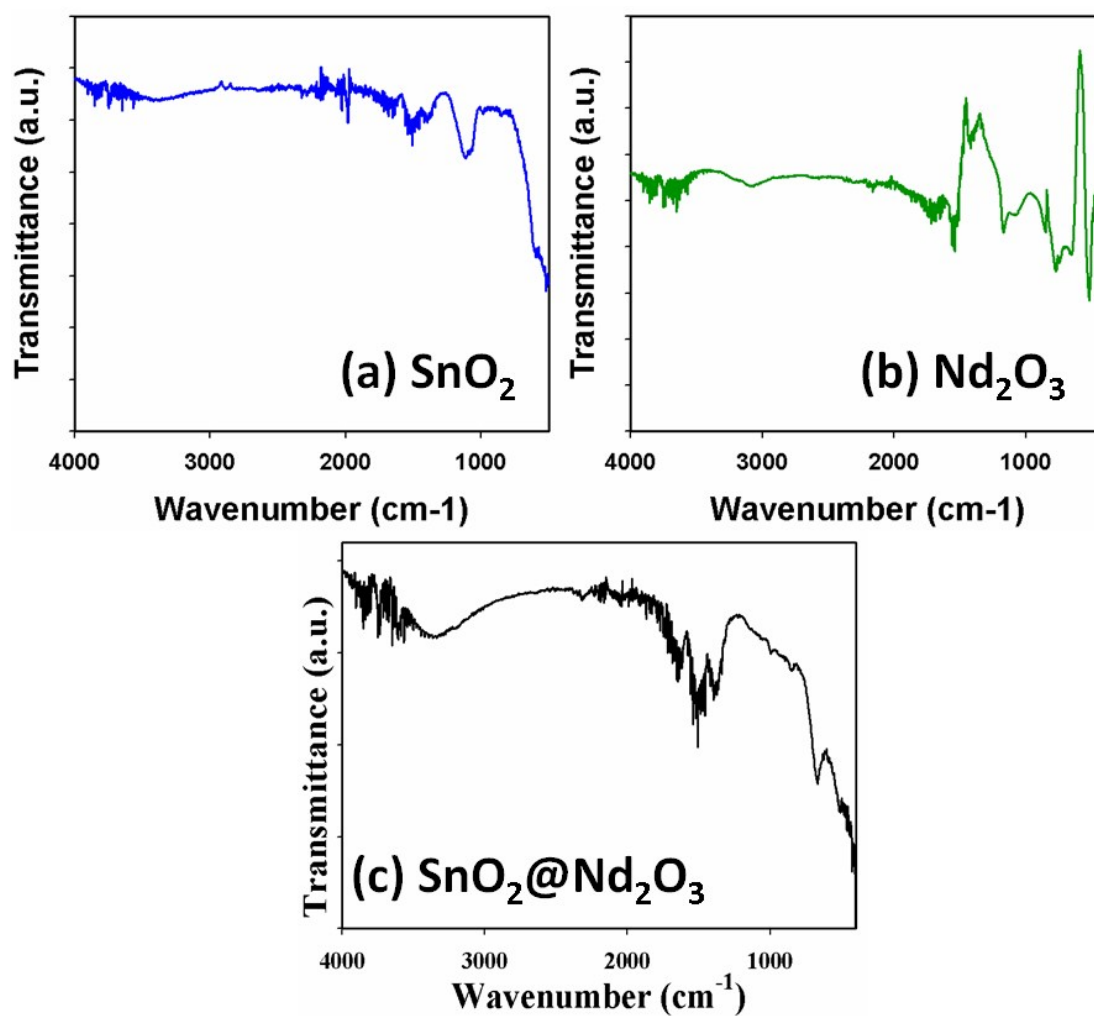

**Fig. S2. Comparative FTIR analysis of (a) SnO<sub>2</sub>, (b) Nd<sub>2</sub>O<sub>3</sub>, and (c) SnO<sub>2</sub>@Nd<sub>2</sub>O<sub>3</sub> nanocomposites**

(Ψ) Powder XRD analyses:

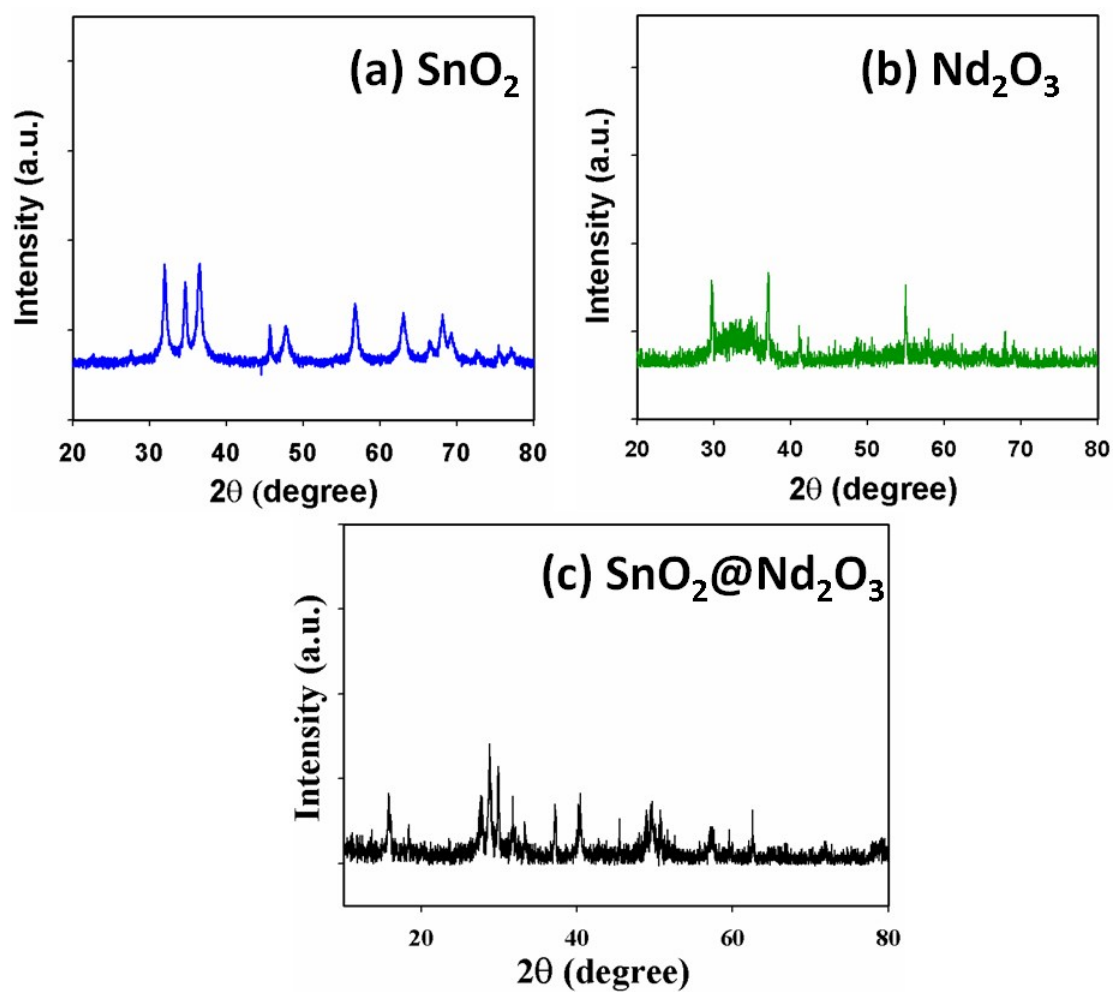

Fig. S3. Comparative powder XRD analysis of (a) SnO<sub>2</sub>, (b) Nd<sub>2</sub>O<sub>3</sub>, and (c) SnO<sub>2</sub>@ Nd<sub>2</sub>O<sub>3</sub> nanocomposites

(γ) FESEM analyses:

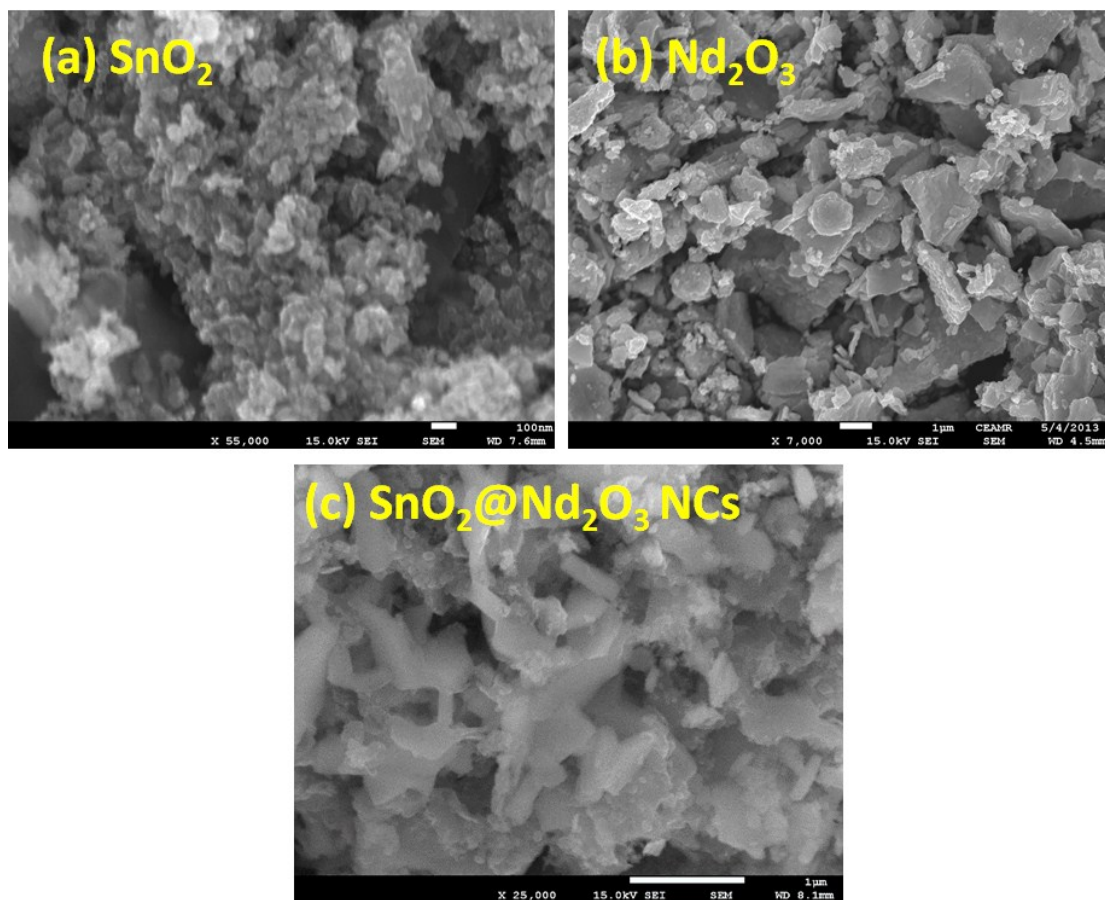

**Fig. S4.** Comparative FESEM analysis of (a)  $\text{SnO}_2$ , (b)  $\text{Nd}_2\text{O}_3$ , and (c)  $\text{SnO}_2@ \text{Nd}_2\text{O}_3$  nanocomposites
